# Supplementary material
Source: bioRxiv or medRxiv preprint supplement (https://www.biorxiv.org/highwire/filestream/40118/field_highwire_adjunct_files/0/136358-1.pdf)

Fig. S1

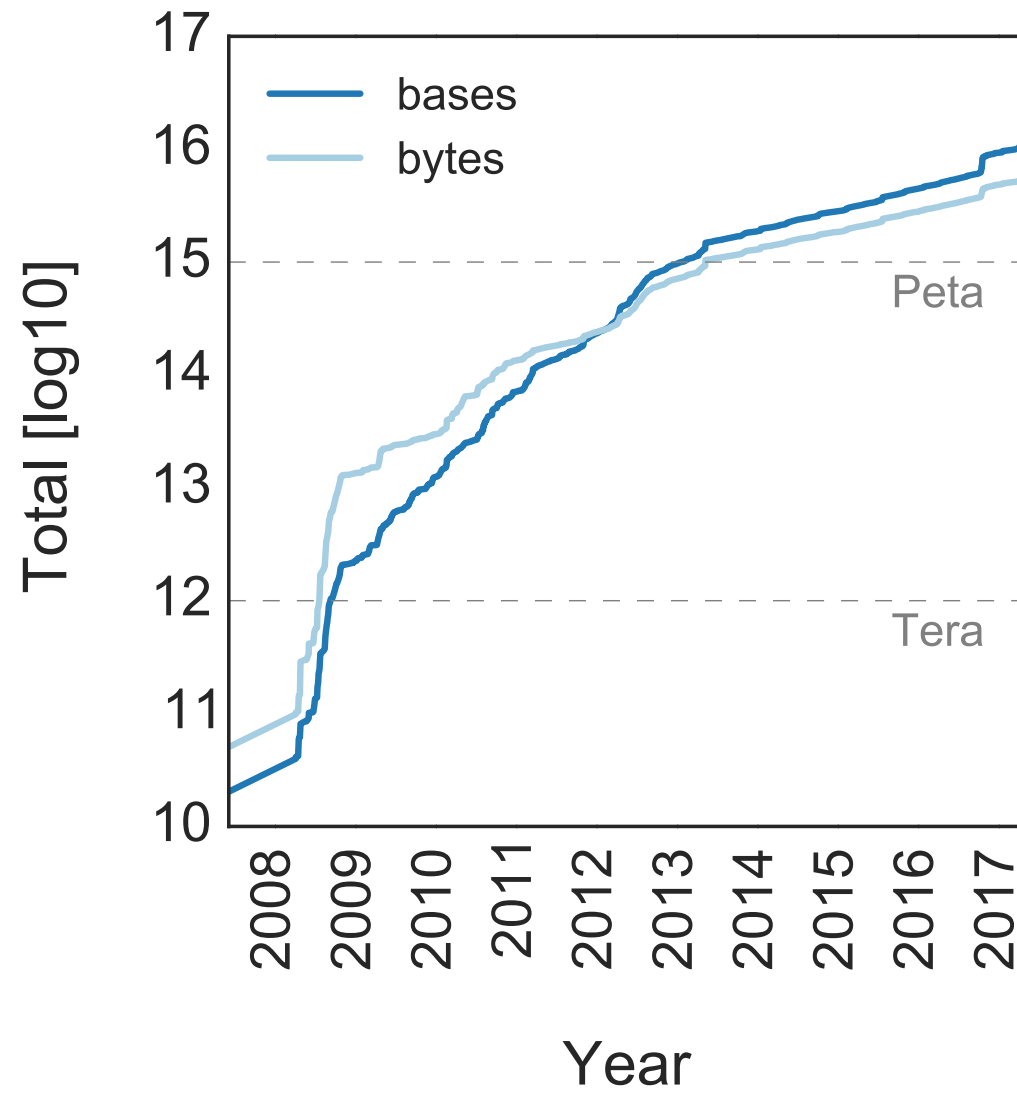

Fig. S2

a

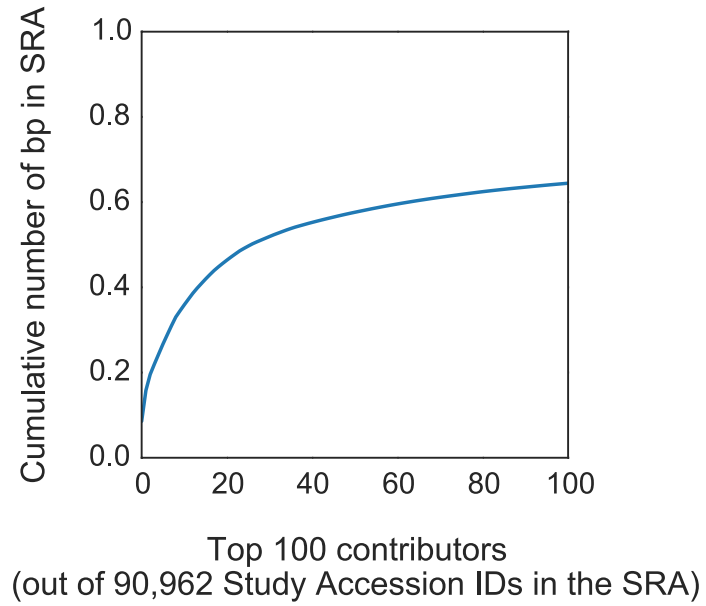

b

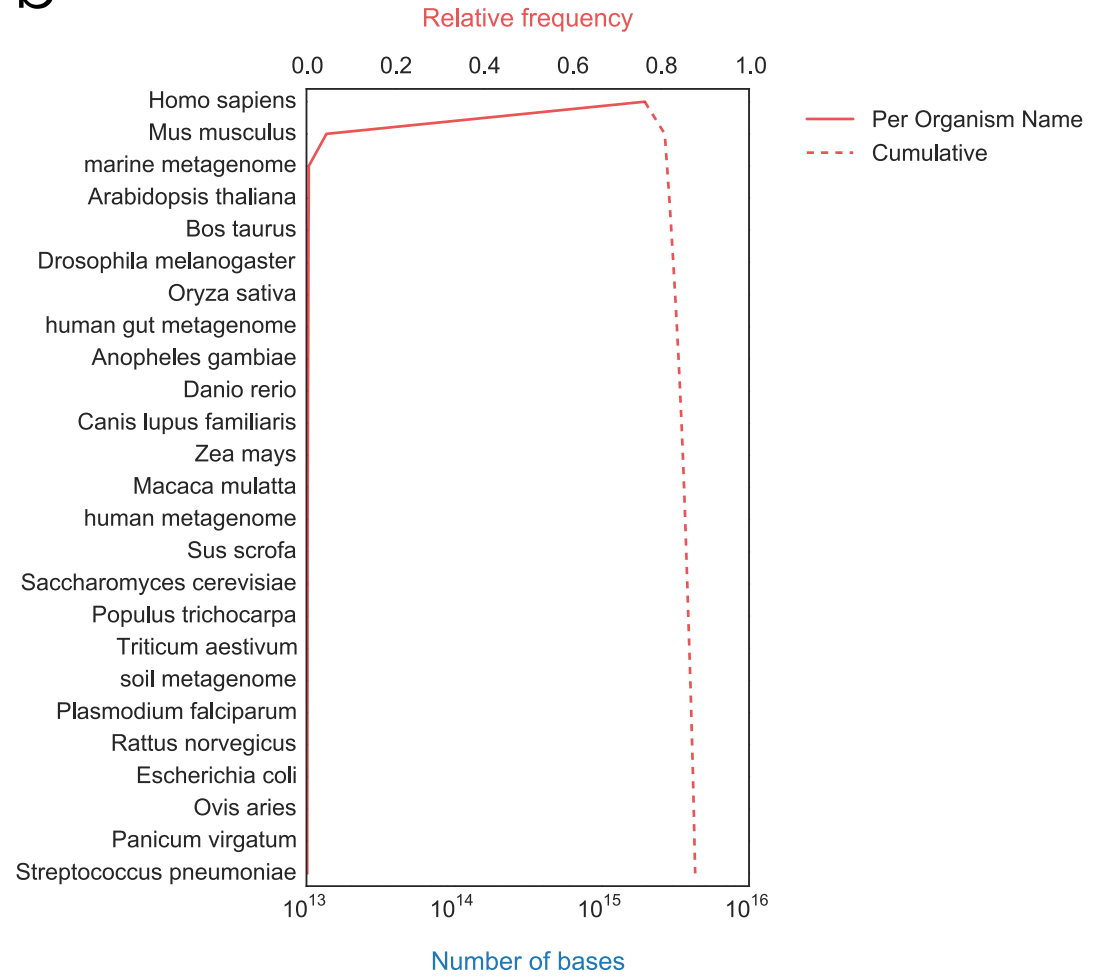

# Fig. S3

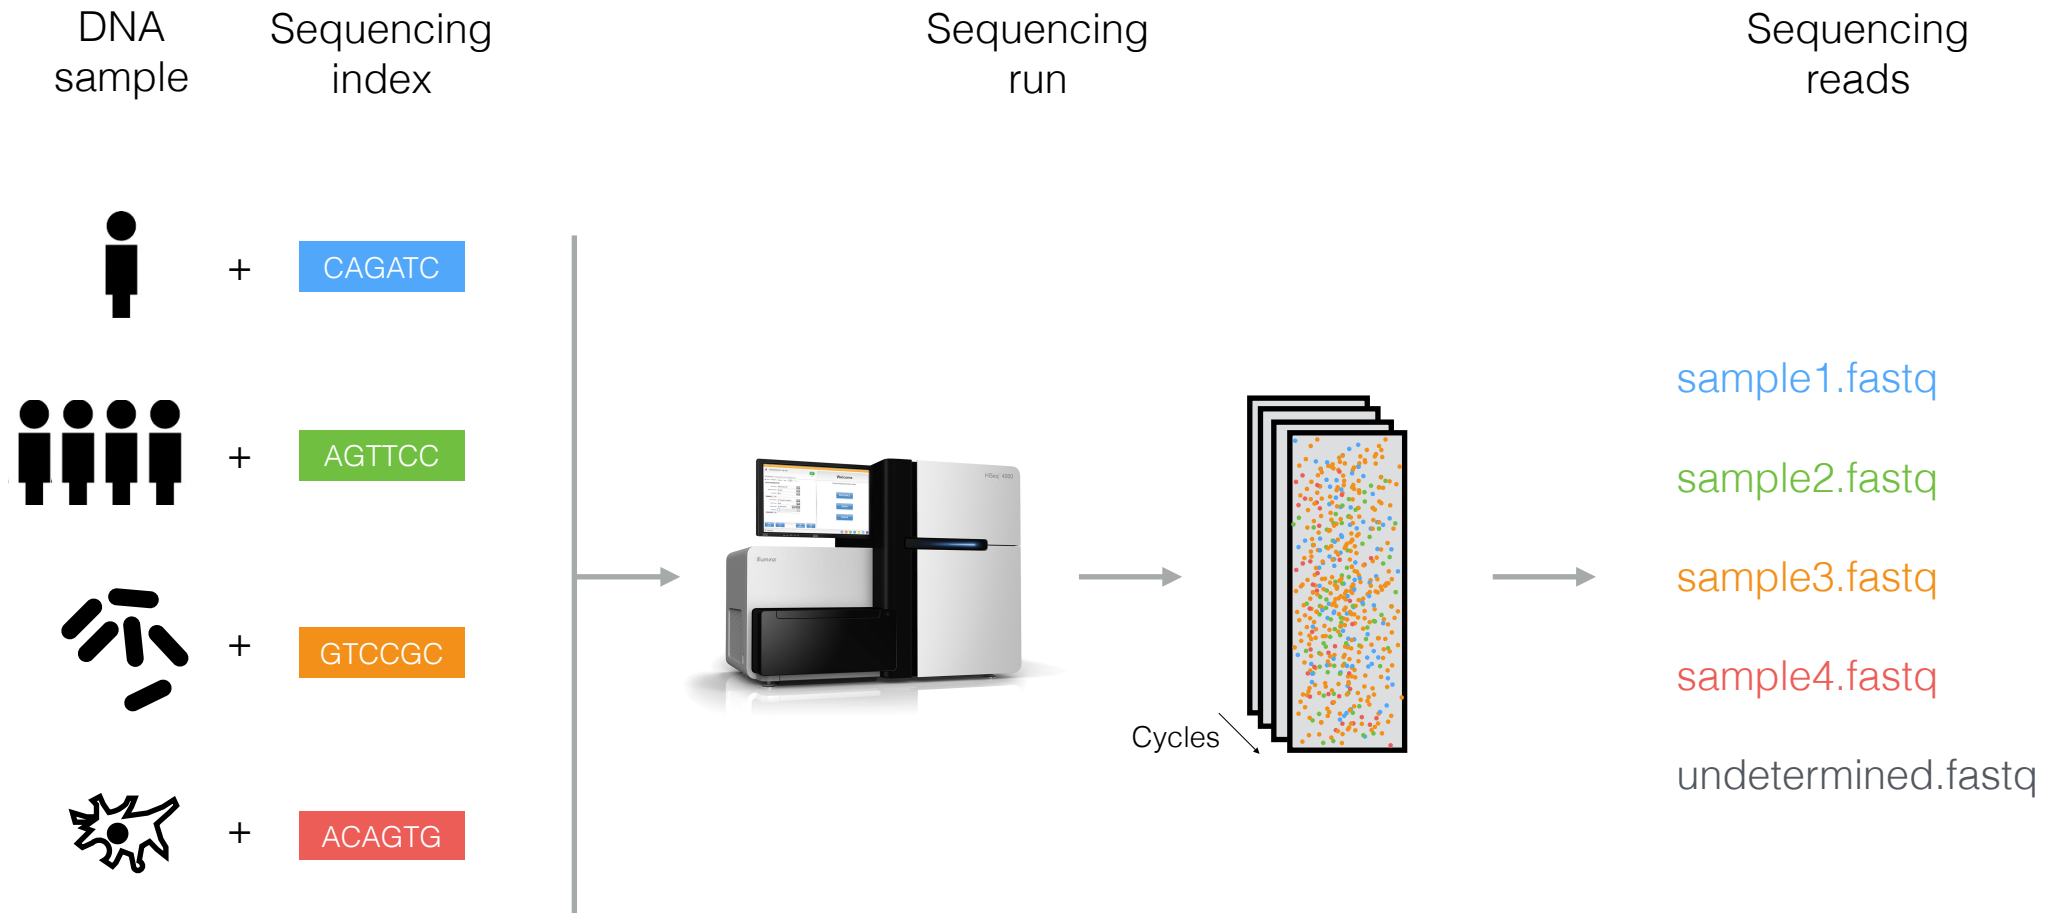

Fig. S4

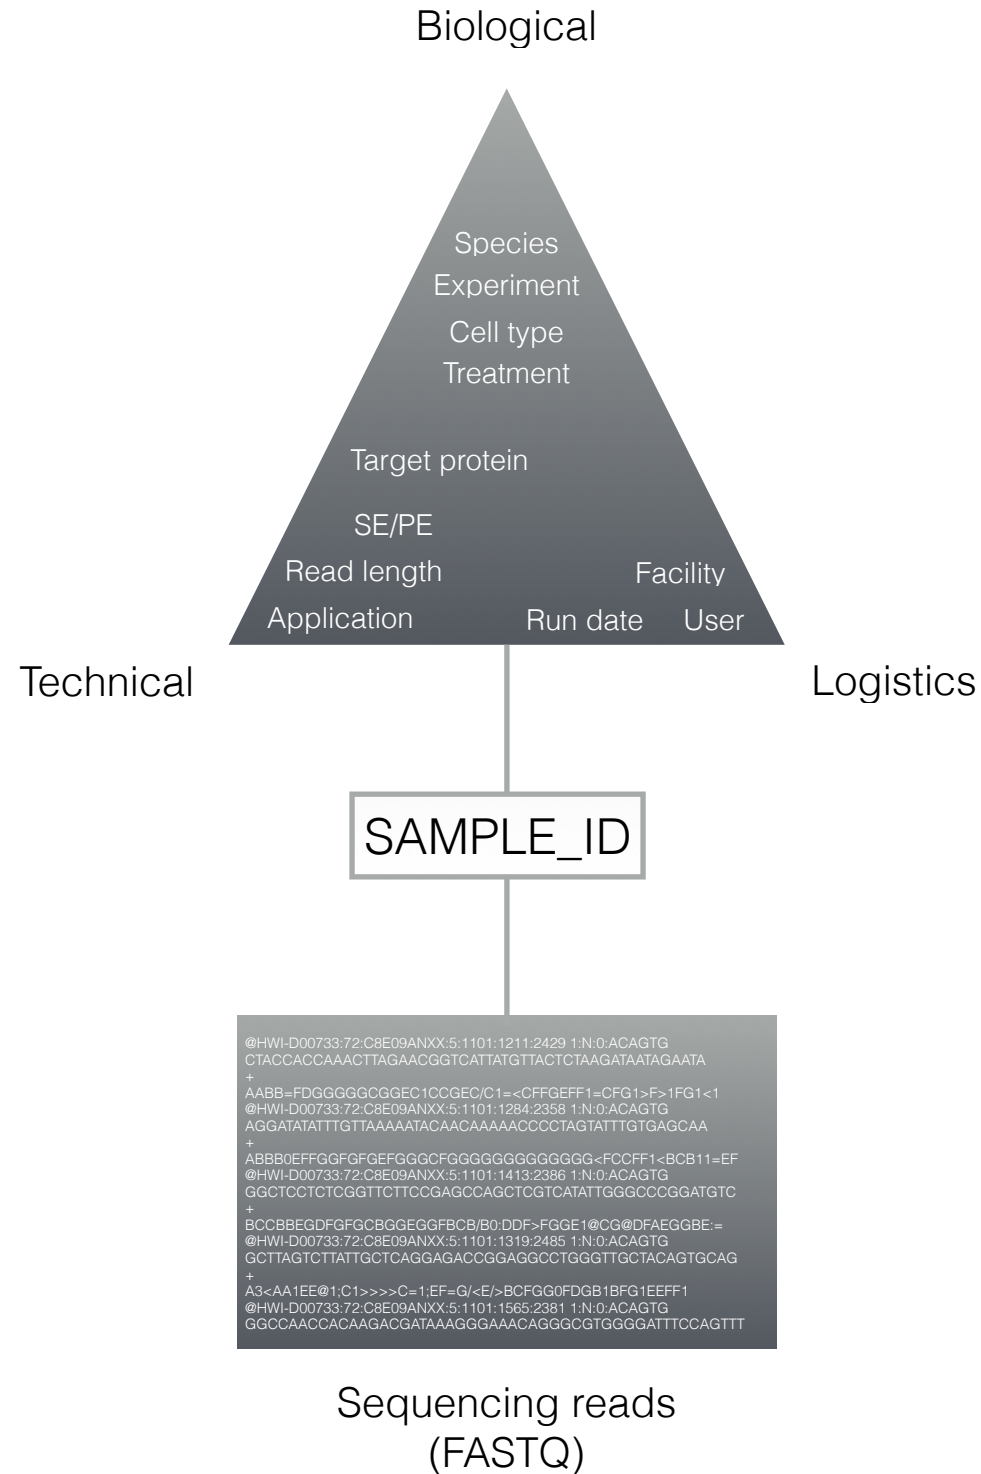

# Fig. S5

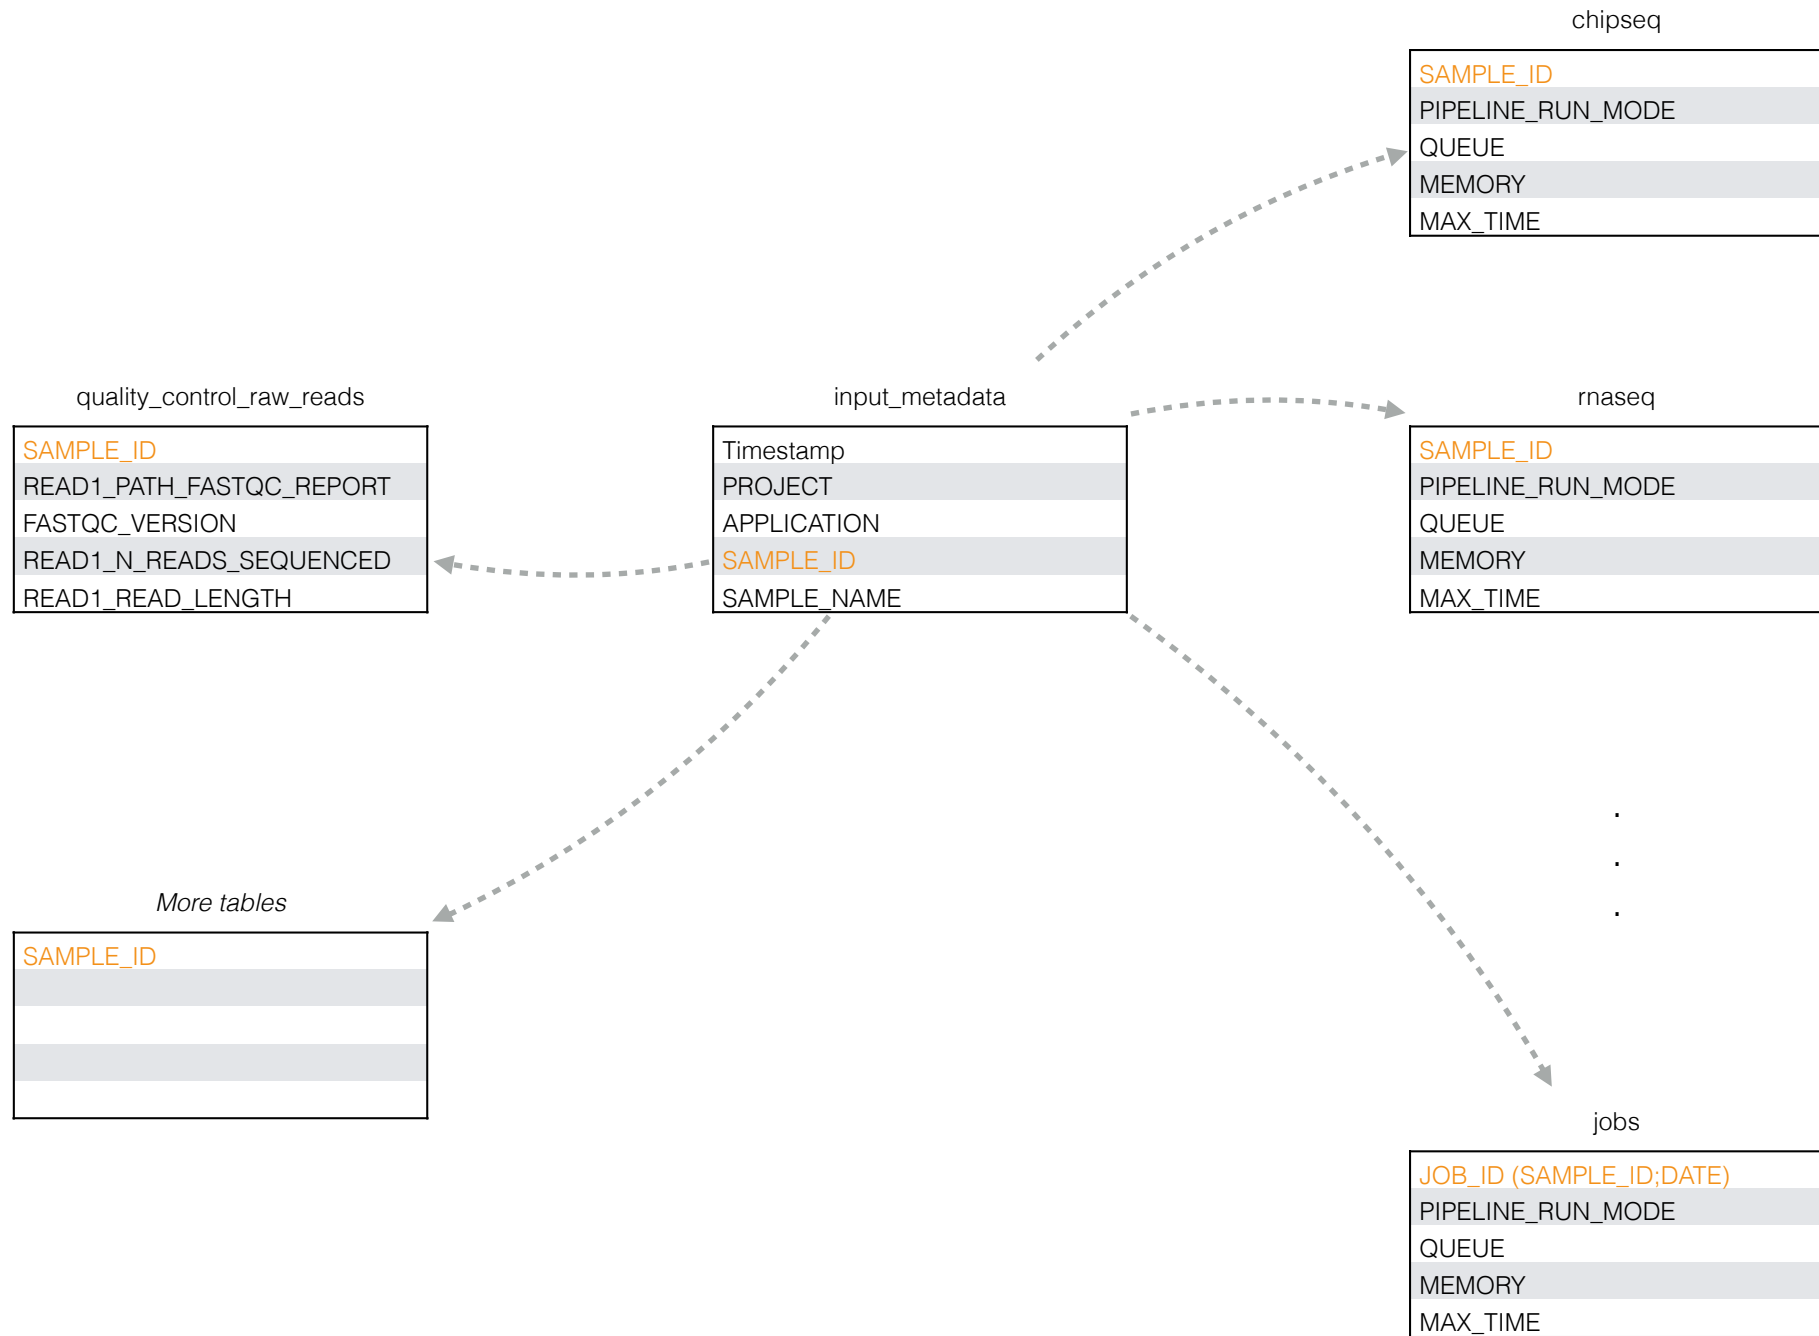

Fig. S6

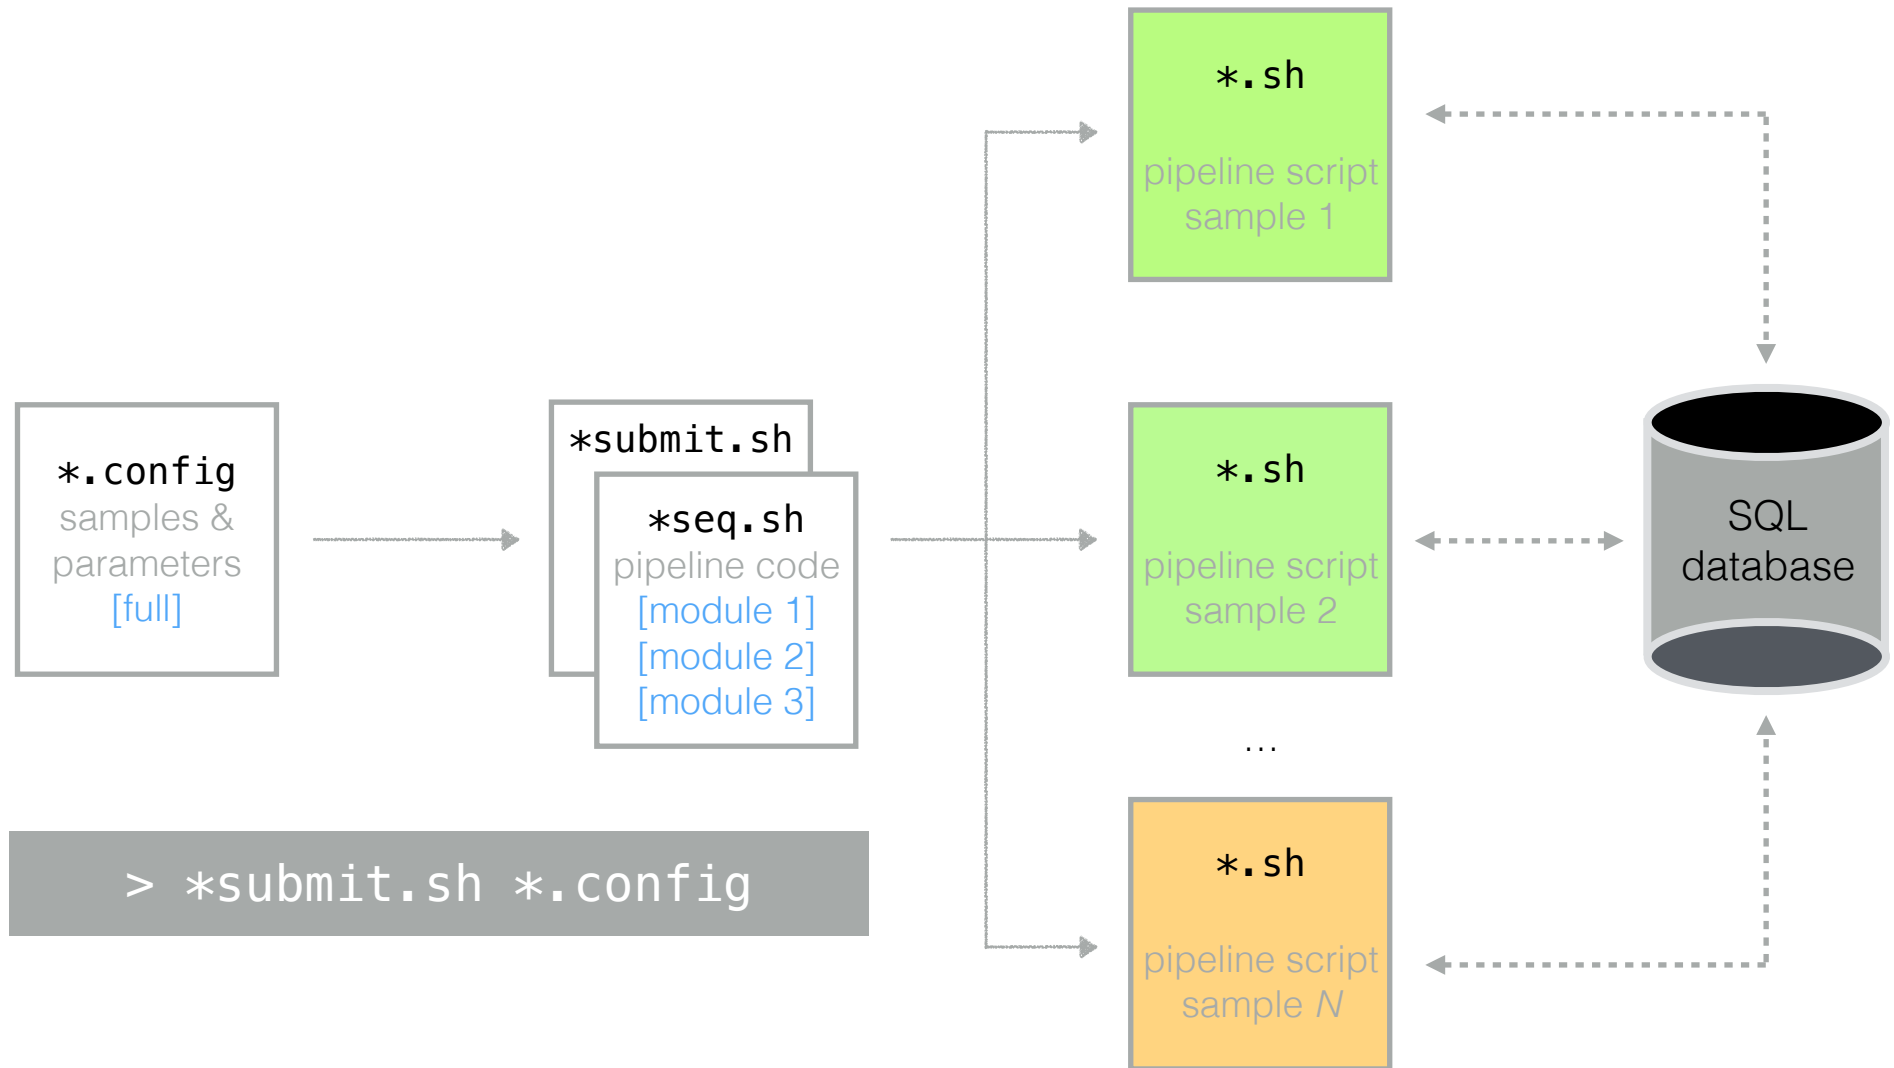

Fig. S7

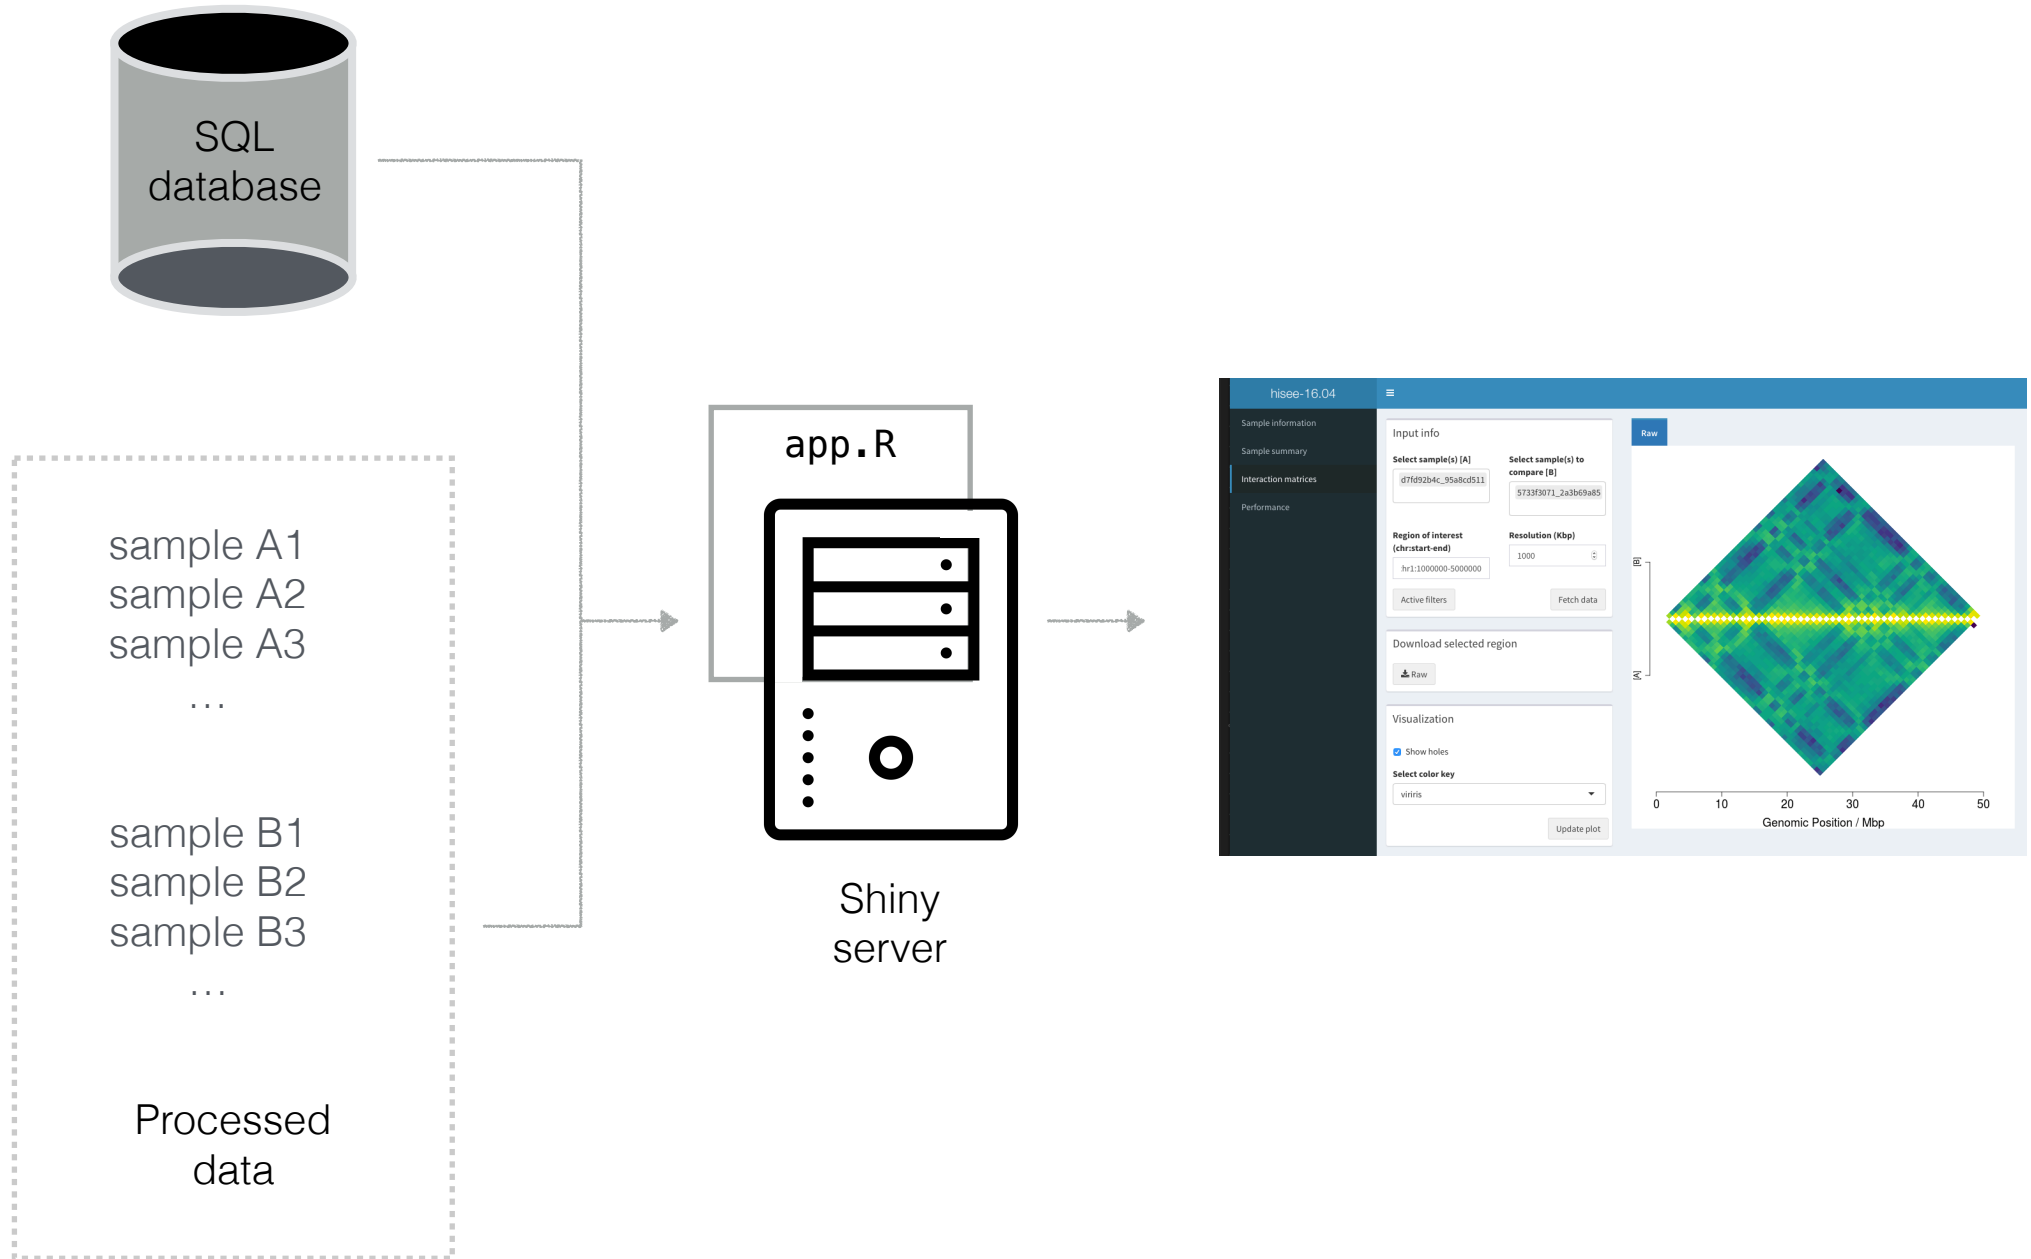

Supplement: Supplementary file [file 136358-1.pdf]
